# Supplementary material for: Streptococcus Sanguis Biofilm Architecture and Its Influence on Titanium Corrosion in Enriched Artificial Saliva
Source: MDPI journal article supplement (doi:10.3390/ma10030255), 2017-03-03
Supplement: s1 [file s1]

## Supplementary Materials: *Streptococcus Sanguis* Biofilm Architecture and Its Influence On Titanium Corrosion in Enriched Artificial Saliva

Lei Li, Shunling Li, Qing Qu, Limei Zuo, Yue He, Baolin Zhu, Yaxin Kang, Xingcan Qian, Xin Ran and Cong Li

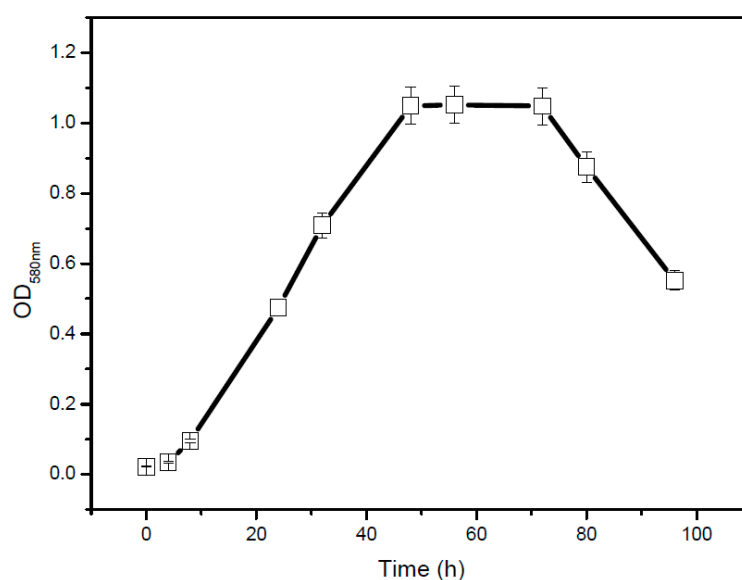

**Figure S1.** The growth phase of *S. sanguis* in sterile artificial saliva at 37 °C.

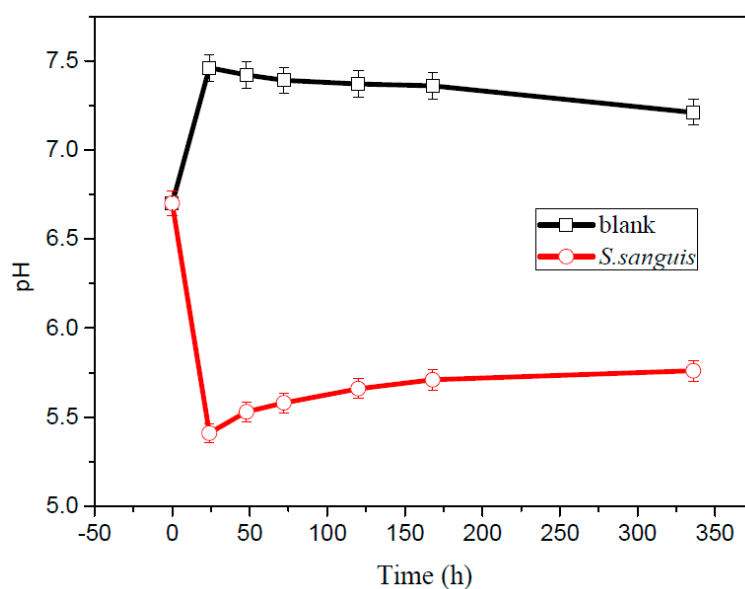

**Figure S2.** pH value of artificial saliva containing working electrode with and without *S. sanguis* at 37 °C for different time.

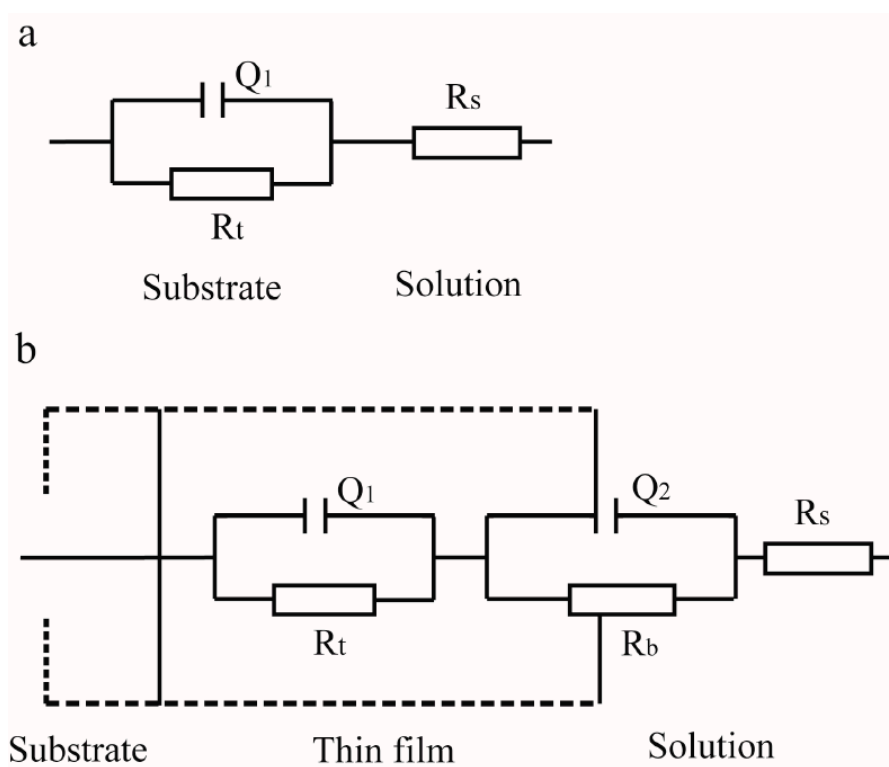

**Figure S3.** Equivalent circuits used for fitting the impedance spectra. (a) Model of  $R_s(Q_1R_t)$  for 24 and 48 h immersion coupons; (b) Model of  $R_s(Q_2R_b)(Q_1R_t)$  for 72, 120, 168 and 336 h immersion coupons.

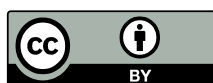

© 2017 by the authors. Submitted for possible open access publication under the terms and conditions of the Creative Commons Attribution (CC-BY) license (<http://creativecommons.org/licenses/by/4.0/>).
